# Supplementary material for: Molecular characterization and functional annotation of a hypothetical protein (SCO0618) of Streptomyces coelicolor A3(2)
Source: PubMed Central journal article supplement (PMC7560446; doi:10.5808/gi.2020.18.3.e28), 2020-09-21
Supplement: gi-2020-18-3-e28-suppl3.pdf [file gi-2020-18-3-e28-suppl3.pdf]

Chain X

M F F V D V L E T E S L G N R S Y L A G G P D A A V V D P P R D I D R V I A A A A R R G V R I A V V A  
E T H V H N D Y V T G G L E L A R L T G A R Y L V P A G A E V A Y A R V A V A D G A V E P V D A G L E L  
R A V A T P G H T P H H T S Y V L E E A G R A V A A F T G G S L L I G T V G R P D L V E P R L T E E L A  
R A Q H A S A H R L A D R L E D A V S V L P T H G F G S F C S S T A A G G E H S T I G A E R A A N P A L  
V Q D A E T F V R E L L A G L D D V P A Y Y A H M A P V N S E G P A P L D L T E P R R A D A D E I A R R  
L A A G E W V V D L R S R V A F A A G H V A G S L N F E A D G Q L A T Y L A W L I P W G R P V T L L A H  
S A D D L A R A Q R E L A R V G I D R P A A A A V G S P A D W V A E G E R P A S F R R A T F A E L A A A  
R R D G A D D M V V V D V R R A A E R A H G W V R G S V H L P V H E I H R R L D E V P P G T V W V H C A  
G G M R A A V A A S V L D A A G R E V V A I D D G F A A A A G A G L P L V T

**Supplementary Fig. 3.** The amino acid residues in the active site (blue color).
